# Supplementary material for: Modifying the magnetic response of magnetotactic bacteria: incorporation of Gd and Tb ions into the magnetosome structure
Source: Royal Society of Chemistry journal article supplement (doi:10.1039/d2na00094f), 2022-01-01
Supplement: d2na00094f1.pdf [file d2na00094f1.pdf]

Cite this: DOI: 00.0000/xxxxxxxxxx

## ESI to: "Modifying the magnetic response of magnetotactic bacteria: Incorporation of Gd and Tb ions into the magnetosome structure"

E. M. Jefremovas,<sup>\*a</sup> L. Gandarias,<sup>b</sup> L. Marcano,<sup>c,d</sup> A. Gacía-Prieto,<sup>e</sup> I. Orue,<sup>f</sup> A. Muela,<sup>b,g</sup> M. L. Fdez-Gubieda,<sup>c,g</sup> L. Fernández Barquín<sup>a</sup> and J. Alonso<sup>\*a</sup>

### Notes and references

- 1 L. Marcano, I. Orue, A. Garcia-Prieto, R. Abrudan, J. Alonso, L. Fernandez Barquin, S. Valencia, A. Muela and M. L. Fdez-Gubieda, *The Journal of Physical Chemistry C*, 2020, **124**, 22827–22838.

\* martinjel@unican.es, javier.alonsomasa@unican.es

<sup>a</sup> Dpto. CITIMAC, Universidad de Cantabria, 39005 Santander, Spain

<sup>b</sup> Dpto. Inmunología, Microbiología y Parasitología, Universidad del País Vasco (UPV/EHU), 48940 Leioa, Spain

<sup>c</sup> Helmholtz-Zentrum Berlin für Materialien und Energie, Albert-Einstein-Str. 15,

12489 Berlin, Germany

<sup>d</sup> Dpto. Electricidad y Electrónica, Universidad del País Vasco (UPV/EHU), 48940 Leioa, Spain

<sup>e</sup> Dpto. Física Aplicada, Universidad del País Vasco (UPV/EHU), 48013 Bilbao, Spain

<sup>f</sup> SGiker Medidas Magnéticas, Universidad del País Vasco (UPV/EHU), 48940 Leioa, Spain

<sup>g</sup> BCMaterials, Basque Center for Materials, Applications and Nanostructures, UPV/EHU, Spain

† Electronic Supplementary Information (ESI) available: Fig. S1 TEM images showing the appearance of RE salts attached to the bacterial body and chain anomalies/deformed magnetosomes inside the bacteria. Fig. S2 includes the ZFC/FC  $M$  vs.  $H$  curves measured at different temperatures for the RE-doped MTB. Fig. S3 offers a comparison between the thermal evolution of  $\Delta H_C$  and  $\Delta M_r/M_s$  of the undoped, Gd [100:100], Tb [100:100], Mn [480:100] and Mn [100:100] bacterial samples. See DOI: 00.0000/00000000.

# Gd-doped

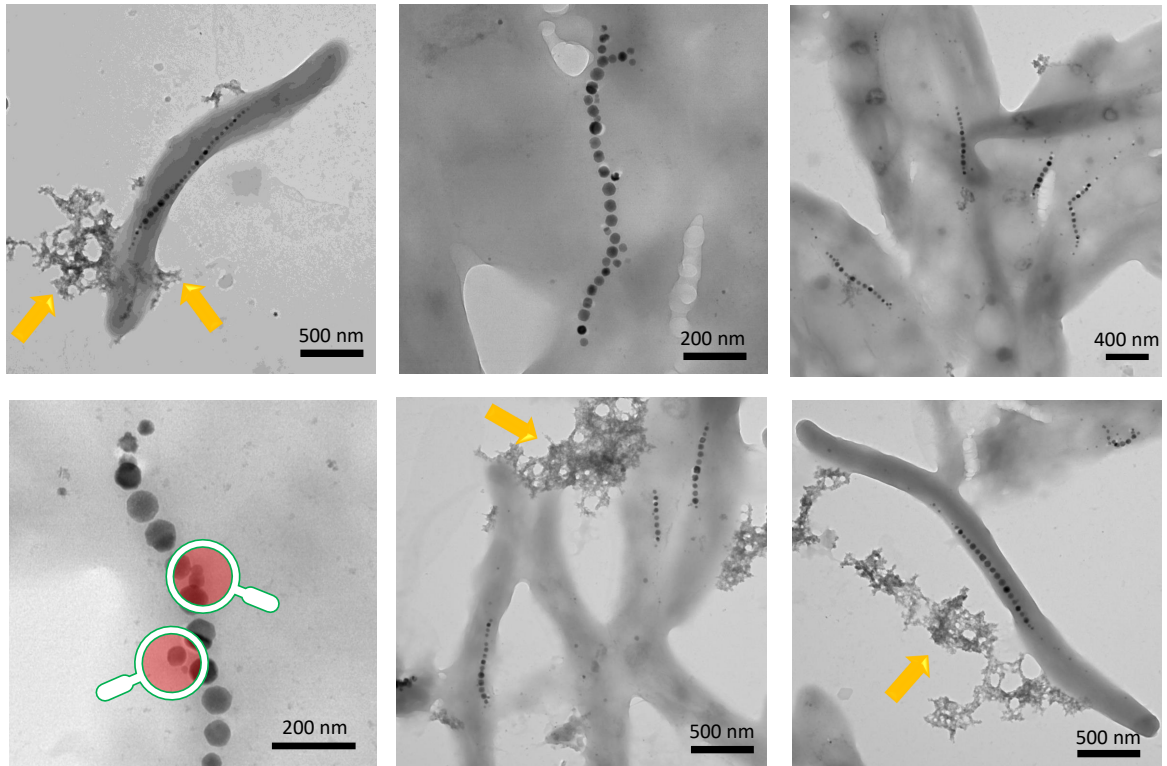

Fig. 1 Collection of TEM images corresponding to Gd-doped bacteria. Yellow arrows mark the existence of R salts attached to the bacterial body. Particular smaller or less faceted magnetosomes have been enclosed with red lens.

# Tb-doped

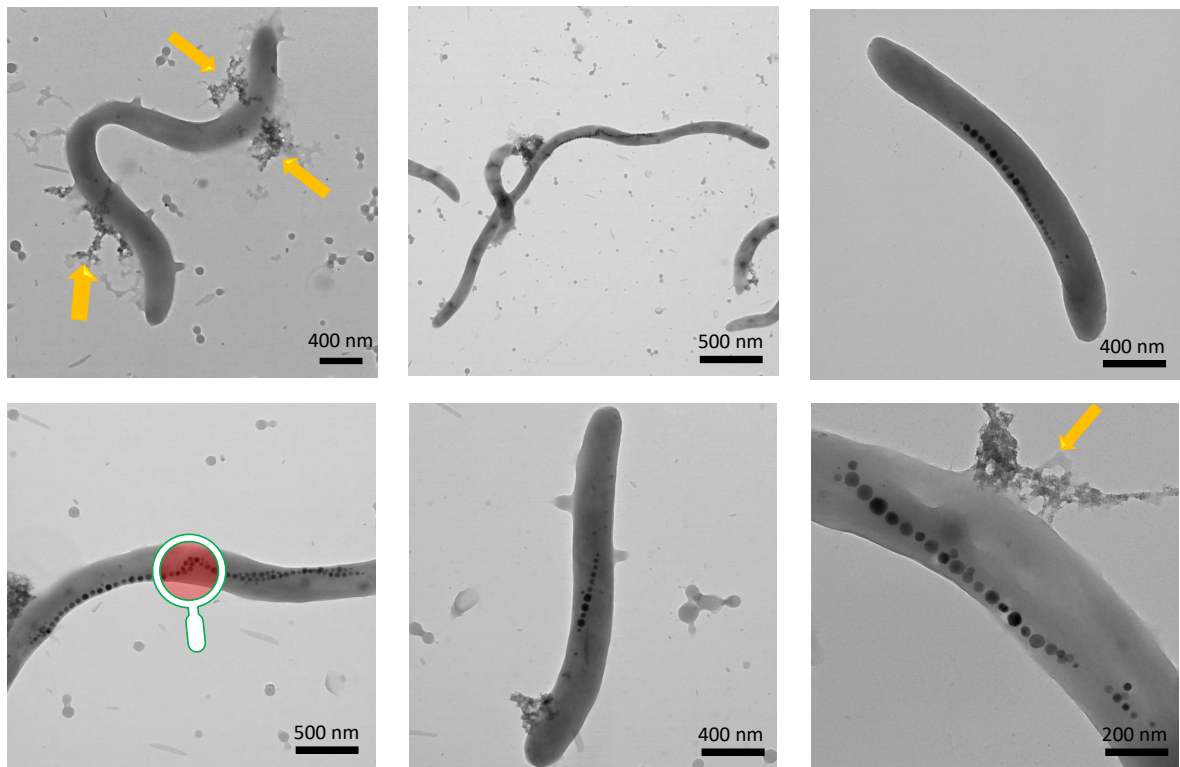

Fig. 2 Collection of TEM images of Tb-doped bacteria. As in Fig. S1, yellow arrows mark the existence of R salts attached to the bacterial body. Here, we have magnified in red the curvature found at the bottom of two chains, different from the regularly found linear shape.

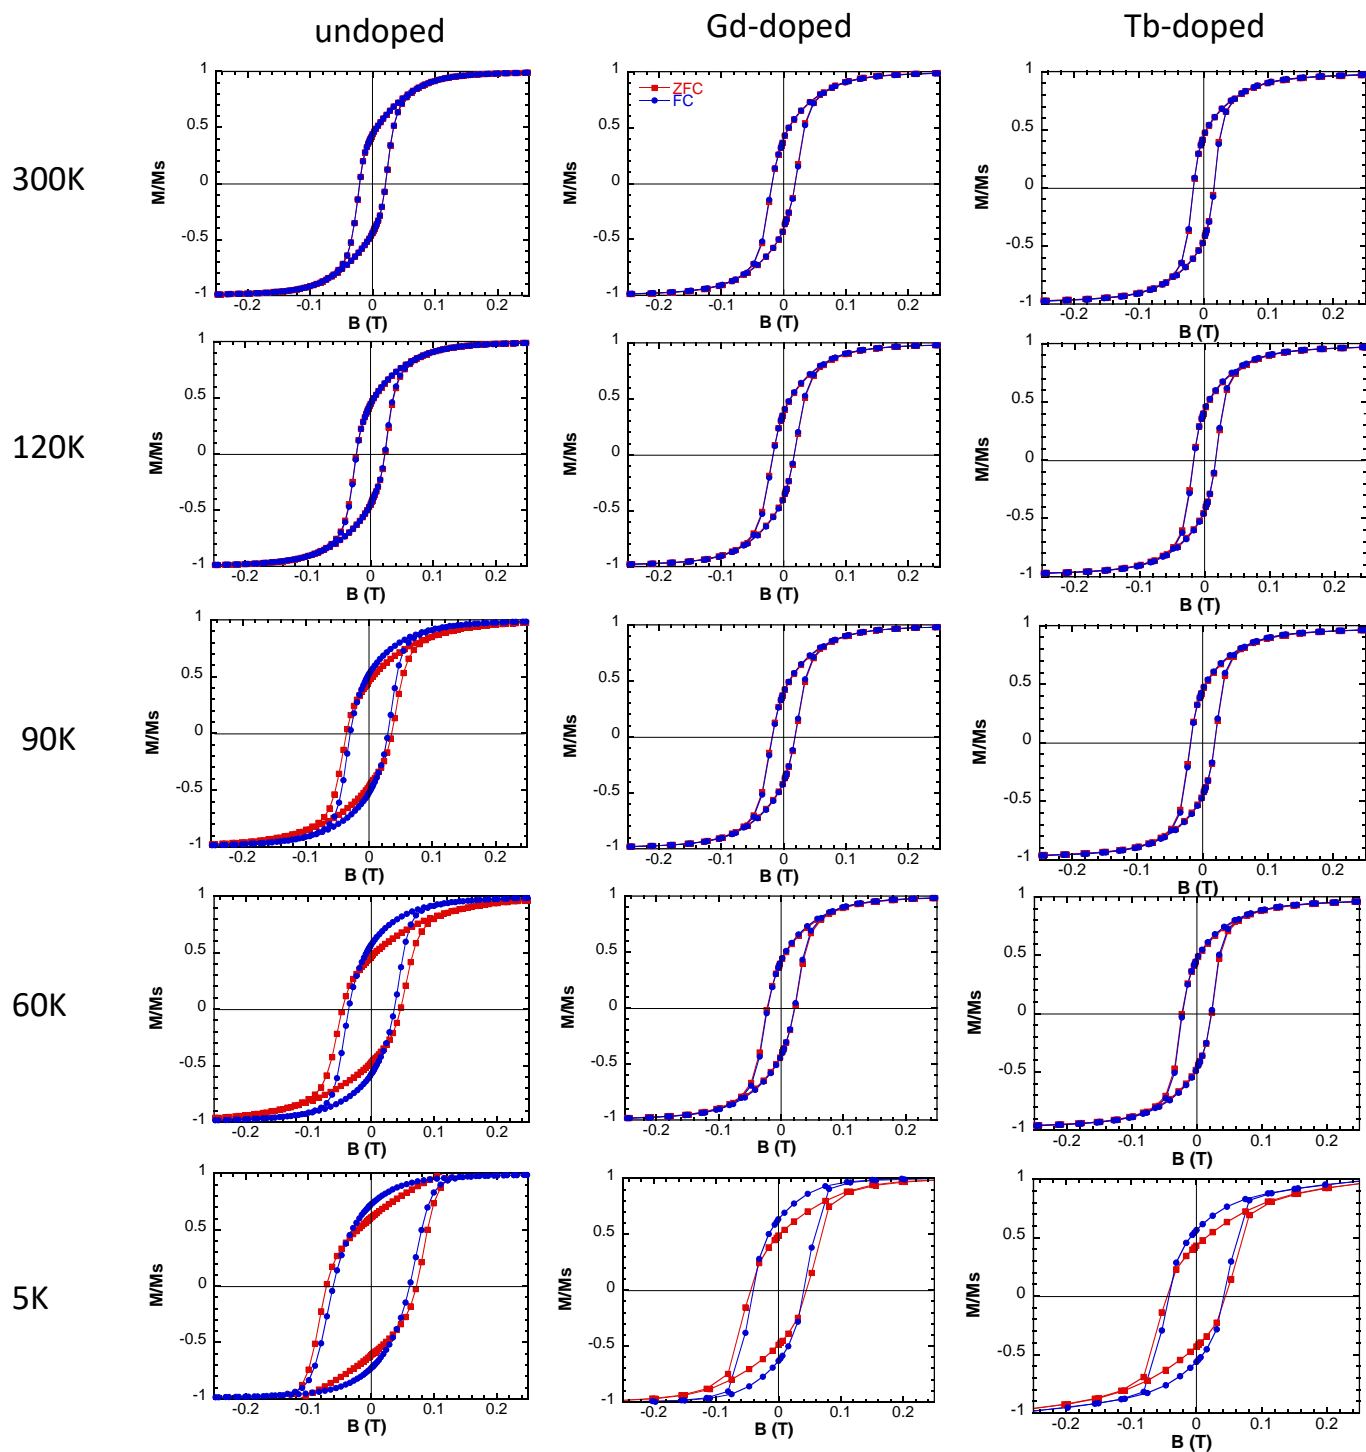

Fig. 3 ZFC/FC  $M$  vs.  $H$  curves measured at different temperatures for the RE-doped MTB. The increasing paramagnetic contribution at low  $T$  is clearly depicted.

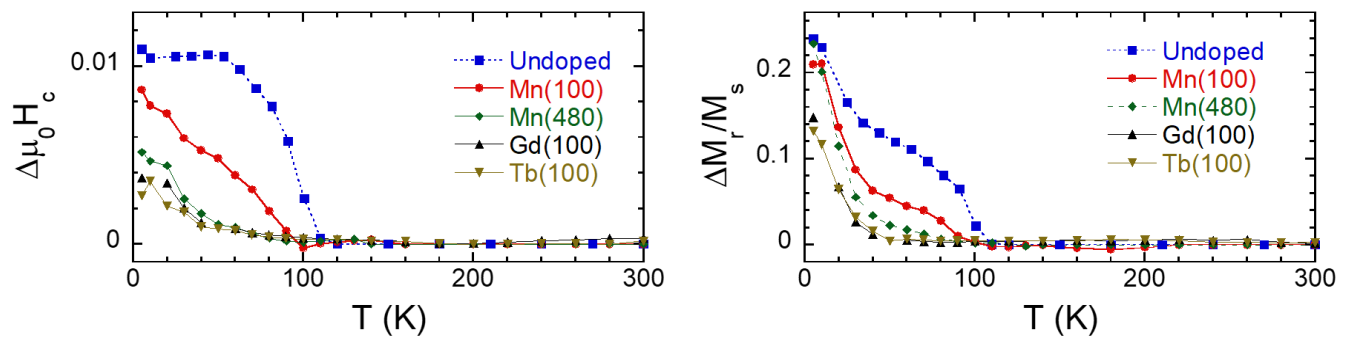

Fig. 4 Comparison between the thermal evolution of  $\Delta H_C$  and  $\Delta M_r/M_s$  of the undoped, Gd [100:100], Tb [100:100], Mn [480:100] and Mn [100:100] bacterial samples. The data for the Mn-doped bacteria have been obtained from our recent work, Ref.<sup>1</sup> (reproduced with permission).
